# Menopause Modifies the Association of Leukocyte Telomere Length with Insulin Resistance and Inflammation

Abraham Aviv, Ana Valdes, Jeffrey P. Gardner, Rami Swaminathan, Masayuki Kimura, and Tim D. Spector

*Twin Research and Genetic Epidemiology Unit (A.V., T.D.S.) and Department of Chemical Pathology (R.S.), St. Thomas' Hospital, London SE1 7EH, United Kingdom; and Department of Pediatrics (A.A., J.P.G., M.K.), Hypertension Research Center, University of Medicine and Dentistry of New Jersey, New Jersey Medical School, Newark, New Jersey 07103*

**Context:** Leukocyte telomere length is inversely correlated with age, insulin resistance, serum leptin, and smoking.

**Objective:** We explored whether menopausal status modifies the relations between leukocyte telomere length and insulin resistance. In addition, we examined the effect of menopause on the relation between leukocyte telomere length and C-reactive protein (CRP), an index of inflammation.

**Design:** This was an observational cohort study.

**Setting:** The study setting was community based.

**Participants:** A total of 1517 women aged 18–79 yr selected only for belonging to a twin pair and representative of the general population participated in the study.

**Main Outcome Measure:** Leukocyte telomere restriction fragment length (TRFL) was measured.

**Results:** Insulin resistance (expressed in the homeostasis model assessment), leptin, and CRP were inversely correlated with leukocyte TRFL in premenopausal but not postmenopausal women. Insulin resistance, CRP, but not leptin independently accounted for variation in white blood cell TRFL in premenopausal women.

**Conclusions:** Menopausal status impacts leukocyte telomere length and its relation with insulin resistance and inflammation in women. (*J Clin Endocrinol Metab* 91: 635–640, 2006)

INCREASED ADIPOSITY IS associated with a rise in systemic inflammation (1–4) and oxidative stress (5, 6). Both processes may accelerate telomere erosion in leukocytes because inflammation enhances the turnover rate of leukocytes and oxidative stress heightens the loss of telomeric repeat per cell replication (7). Such mechanisms provide a potential explanation for findings of accelerated leukocyte telomere attrition with a rise in insulin resistance and a gain in the body mass index (BMI) in a longitudinal study (8) and the inverse correlations of leukocyte telomere length with insulin resistance (unpublished data), serum leptin, and BMI (9) in cross-sectional analyses of relatively large populations. What's more, it appears that leukocyte telomere dynamics (telomere length and attrition rate) are influenced not by the body mass *per se* but by mechanisms linked to obesity, expressed in elevated insulin resistance and leptin levels.

There are considerable age-dependent reconfigurations of both insulin resistance and adiposity, which, in women, are further modified by the menopausal status. For instance,

glucose intolerance is increased not only with the redistribution of body fat toward more central obesity but also due to fat accumulation in skeletal muscle and liver, a phenomenon associated with mitochondrial dysfunctions (10–14). These changes may alter insulin-dependent glucose regulation. Moreover, whereas insulin resistance primarily relates to visceral fat, leptin levels are predominantly a function of sc fat (15–17).

Given that the postmenopausal state is frequently marked by increased central obesity (18), the interrelation between leukocyte telomeres dynamics with both insulin resistance and leptin may differ in postmenopausal *vs.* premenopausal women. Although previous works have observed that insulin resistance (8) and leptin (9) were inversely correlated with age-adjusted telomere length, the question is whether these two variables, which are linked to adiposity, independently account for variation in leukocyte telomere length. In addition, because insulin resistance is a state of increased inflammation (1–3), we examined in this work the interrelation between leukocyte telomere length and C-reactive protein (CRP), the plasma concentration of which increases with inflammation (19, 20). Our main goal was to examine the effect of menopausal status (women 50 yr old or younger *vs.* women older than 50 yr) on the relations of leukocyte telomere length with insulin resistance, serum leptin, and CRP in a large female cohort and explore which of these variables independently accounts for variation in telomere length among individuals.

First Published Online November 22, 2005

Abbreviations: BMI, Body mass index; CRP, C-reactive protein; Gpx, glutathione peroxidase; HOMA-IR, insulin resistance evaluation using the homeostasis model assessment; Mn-SOD, mitochondrial superoxide dismutase; MW, molecular weight; NF $\kappa$ B, nuclear factor- $\kappa$ B; PI3K, phosphoinositol 3-kinase; SSC, saline sodium citrate; TERT, catalytic subunit of telomerase; TRFL, telomere restriction fragment length.

JCEM is published monthly by The Endocrine Society (<http://www.endo-society.org>), the foremost professional society serving the endocrine community.

## Subjects and Methods

### Subjects

We studied 1517 Caucasian female twins (aged 18–79 yr) from the St. Thomas' (Twins UK) Adult Twin Registry. They were ascertained from the general population and shown to be comparable with age-matched population singletons (21, 22). These unselected twins have been recruited since 1992 using twin registers and national media campaigns and used in a wide variety of studies (23). Historically the cohort is predominantly female, and measurements were performed preferentially on dizygotic twins as part of ongoing genetic studies. All women provided informed consent approved by The St. Thomas' Hospital Research Ethics Committee. A recent communication reported leukocyte telomere length in relation to BMI, leptin, and cigarette smoking in a subset of this cohort (9).

For all practical purposes, by the age of 50 yr, most women have reached menopause. We therefore characterized women according to age 50 yr or younger as premenopausal and women older than 50 yr as postmenopausal. In this cohort, the subset of women for which age at natural menopause (at least 1 yr since the last period) could be accurately determined (excluding surgical menopause) was 715, with the median age at menopause 50 yr (mean 48.5, *SD* 4.8).

### General considerations

Means and ranges of quantitative phenotypes in Twins UK are normally distributed and similar to the age-matched general population in the United Kingdom (22). Zygosity was determined by standardized questionnaire and confirmed by DNA fingerprinting.

### Biochemical measurements

Blood sample collection for determination of fasting insulin and glucose was as described by de Lange *et al.* (23). Fasting insulin was determined by immunoassay (Abbott Laboratories Ltd., Maidenhead, UK) and glucose measured on Ektachem 700 multichannel analyzer, using an enzymatic colorimetric slide assay (Johnson and Johnson Clinical Diagnostic Systems, Amersham, UK). Insulin resistance was evaluated using the homeostasis model assessment (HOMA-IR), calculated as (fasting insulin  $\times$  glucose)/22.5 (23). Plasma leptin concentration was determined after an overnight fast using a RIA (Linco Research, St. Louis, MO). CRP assays were performed by an ELISA method, which has a lower detection limit of 0.15 mg/liter and a coefficient of variation of 8.7% at 0.5 mg/liter. Subjects with levels above 10 mg/liter were excluded because this indicated clinically relevant infection inflammation or malignancy.

### Measurement of the mean terminal restriction fragment length (TRFL)

Measurements were performed as previously described (8). Briefly, DNA samples were checked for integrity on 0.8% agarose gel. They were then digested overnight with restriction enzymes *HinfI* (10 U) and *RsaI* (10 U) (Roche, Indianapolis IN). DNA samples (3  $\mu$ g each) and four DNA ladders (1 kb DNA ladder plus  $\lambda$  DNA/*HindIII* fragments; Invitrogen, Carlsbad, CA) were resolved on a 0.5% agarose gel (20 cm  $\times$  20 cm) at

50 V (GNA-200; Pharmacia Biotech, Uppsala, Sweden). After 16 h, the DNA was depurinated for 15 min in 0.25 N HCl, denatured 30 min in 0.5 mol/liter NaOH per 1.5 mol/liter NaCl, and neutralized for 30 min in 0.5 mol/liter Tris (pH 8)/1.5 M NaCl. The DNA was transferred for 1 h to a positively charged nylon membrane (Roche) using a vacuum blotter (Appligene; Oncor, Gaithersburg, MD). The membranes were hybridized at 65 C with the telomeric probe [digoxigenin 3'-end-labeled 5'-(CCTAAA)<sub>3</sub>] overnight in 5 $\times$  saline sodium citrate (SSC), 0.1% Sarkosyl, 0.02% sodium dodecyl sulfate, and 1% blocking reagent (Roche). The membranes were washed three times at room temperature in 2 $\times$  SSC and 0.1% sodium dodecyl sulfate each for 15 min and once in 2 $\times$  SSC for 15 min. The digoxigenin-labeled probe was detected by the digoxigenin luminescent detection procedure (Roche) and exposed on x-ray film. The autoradiographs were scanned and the TRFL signal digitized between molecular weight (MW) of 1–20 kb. The mean TRF length was then calculated accordingly. Conversion of the OD *vs.* DNA migration distance to OD (adjusted for background)/MW *vs.* MW yielded a new histogram from which the mean TRFL was calculated. We routinely resolve each DNA sample in duplicate (on different gels). If the difference between the duplicates is more than 5%, a third measurement is performed and the mean of two results less than 5% apart is taken.

### Statistical analysis

Univariate and multivariate ANOVAs were used to compare the characteristics of women aged 50 yr or younger with women older than 50 yr. Standard multiple linear regression techniques were used to assess the correlation of TRFL with the individual factors listed in Table 1 including age and other covariates as indicated. Natural log-transformed leptin, insulin, glucose, HOMA-IR, and CRP values were used for all statistical analyses. Because twin-pair data are not independent observations, we examined the correlation between TRFL *vs.* the various factors, taking an independent sample each time, *i.e.* a subset of samples composed of a random twin from each pair. This bootstrap procedure was carried out 100 times, and the mean test statistic was used to assess statistical significance where indicated. S-Plus 6.0 (Insightful Corp., Basingstoke, UK) software was used.

## Results

### General characteristics

Table 1 displays major characteristics of premenopausal (age 50 yr or younger), postmenopausal (age older than 50 yr), and both combined. There was an approximately 20-yr difference in the mean age between postmenopausal and premenopausal women. The BMI, fasting insulin, glucose, HOMA-IR, leptin, and CRP were all higher in postmenopausal than premenopausal women. Whereas 26.5% of women 50 yr or younger smoked, only 15.2% of women older than 50 yr were still smokers. Ex-smokers comprised 49.9% of women 50 yr or younger and 51.0% of women older than 50 yr.

**TABLE 1.** Descriptive statistics of study participants

| Parameter                | All samples (n = 1517) |       | Age $\leq$ 50 yr (n = 833) |       | Age > 50 yr (n = 683) |       | <i>P</i> <sup>a</sup> |
|--------------------------|------------------------|-------|----------------------------|-------|-----------------------|-------|-----------------------|
|                          | Mean                   | SD    | Mean                       | SD    | Mean                  | SD    |                       |
| Age (yr)                 | 48.03                  | 12.68 | 38.31                      | 8.28  | 58.96                 | 6.18  |                       |
| BMI (kg/m <sup>2</sup> ) | 24.99                  | 4.69  | 24.60                      | 4.78  | 25.39                 | 4.56  | 0.0004                |
| Insulin ( $\mu$ U/ml)    | 7.85                   | 6.43  | 7.14                       | 4.46  | 8.74                  | 8.20  | $2 \times 10^{-5}$    |
| Glucose (mmol/liter)     | 4.57                   | 0.96  | 4.40                       | 0.59  | 4.78                  | 1.24  | $1 \times 10^{-11}$   |
| HOMA-IR <sup>b</sup>     | 1.63                   | 1.70  | 1.41                       | 0.98  | 1.90                  | 2.30  | $2 \times 10^{-8}$    |
| Leptin (ng/ml)           | 17.08                  | 12.67 | 15.65                      | 11.90 | 18.62                 | 13.29 | $7 \times 10^{-5}$    |
| CRP (mg/liter)           | 2.13                   | 2.15  | 1.84                       | 2.17  | 2.39                  | 2.10  | $4 \times 10^{-6}$    |

There were nine singletons and 754 twin pairs.

<sup>a</sup> Comparing women aged 50 yr or younger with those aged older than 50 yr.

<sup>b</sup> (Fasting insulin  $\times$  glucose)/22.5.

**TABLE 2.** Descriptive statistics of TRFL

| TRFL parameters (kb)       | All samples |      | Age ≤ 50 yr |      | Age > 50 yr |      | <i>P</i> <sup>a</sup> |
|----------------------------|-------------|------|-------------|------|-------------|------|-----------------------|
|                            | Mean        | SD   | Mean        | SD   | Mean        | SD   |                       |
| Unadjusted                 | 7.06        | 0.67 | 7.24        | 0.67 | 6.85        | 0.62 | $1 \times 10^{-25}$   |
| Age adjusted               | 7.06        | 0.67 | 7.03        | 0.65 | 7.10        | 0.61 | 0.19                  |
| Age, smoking adjusted      | 7.06        | 0.64 | 7.03        | 0.64 | 7.09        | 0.60 | 0.21                  |
| Age, BMI adjusted          | 7.06        | 0.66 | 7.02        | 0.65 | 7.10        | 0.62 | 0.15                  |
| Age, smoking, BMI adjusted | 7.06        | 0.64 | 7.03        | 0.65 | 7.10        | 0.61 | 0.18                  |

<sup>a</sup> Comparing women aged 50 yr or younger to those aged older than 50 yr.

*TRFL parameters*

The overall yearly rate of leukocyte TRFL attrition was  $20.5 \pm 1.1$  bp ( $r = -0.385, P = 1 \times 10^{-62}$ ). The yearly TRFL attrition for premenopausal women and postmenopausal women were, respectively,  $22.1 \pm 2.9$  and  $20.2 \pm 4.1$  bp.

Table 2 displays the leukocyte TRFL without and with adjustment for age, smoking, and BMI. These adjustments were undertaken based on our previous observations that leukocyte TRFL was inversely correlated with not only age

but also BMI and cigarette smoking (8, 9). Without adjustments, TRFL was shorter by 390 bp in postmenopausal than premenopausal women, but this difference largely disappeared after adjustment for age, smoking, and BMI.

*Correlations among HOMA-IR, leptin, and BMI*

For both pre- and postmenopausal women, there were strong positive correlations between ln-HOMA-IR and ln-leptin (Fig. 1). Strong positive correlations were also ob-

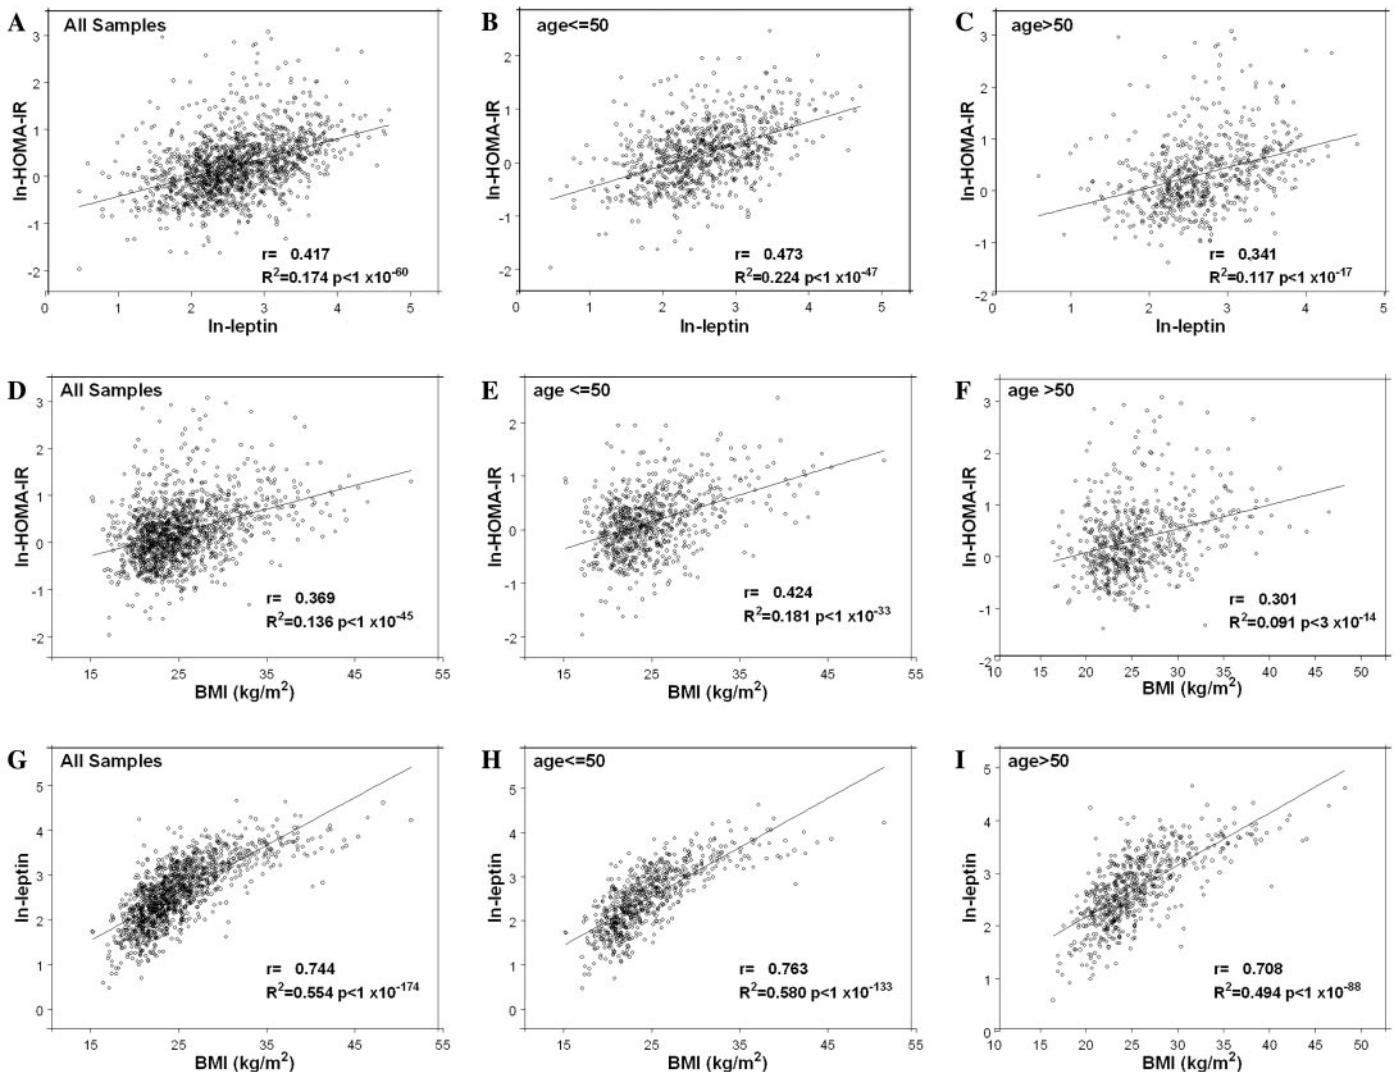

**FIG. 1.** The relationships among ln-HOMA-IR, ln-leptin, and the BMI. The  $r^2$  between ln-leptin and BMI for all samples using the best nonlinear model ( $\ln\text{-leptin} = \ln\text{-BMI}$ ) was only slightly better (0.58) than the linear model used in the figure (0.55).

**TABLE 3.** Correlations of CRP with insulin resistance and leptin

| Factor                  | All samples                           |                          | Age ≤ 50 yr                           |                          | Age > 50 yr |                          |
|-------------------------|---------------------------------------|--------------------------|---------------------------------------|--------------------------|-------------|--------------------------|
|                         | Correlations with ln-CRP <sup>a</sup> | P <sup>b</sup>           | Correlations with ln CRP <sup>a</sup> | P <sup>b</sup>           | r           | P <sup>b</sup>           |
| ln-HOMA-IR <sup>a</sup> | 0.2669                                | 5.27 × 10 <sup>-18</sup> | 0.2760                                | 6.22 × 10 <sup>-11</sup> | 0.2162      | 2.13 × 10 <sup>-6</sup>  |
| ln-Leptin <sup>a</sup>  | 0.4219                                | 1.86 × 10 <sup>-44</sup> | 0.4263                                | 2.07 × 10 <sup>-23</sup> | 0.3758      | 2.22 × 10 <sup>-11</sup> |

<sup>a</sup> In the natural logarithm scale.

<sup>b</sup> Adjusted for nonindependence between twins in pairs.

served for ln-HOMA-IR and ln-leptin with BMI (Fig. 1).

#### Correlations of CRP with HOMA-IR and leptin

There were strong correlations of ln-CRP with both ln-HOMA-IR and ln-leptin for women 50 yr or younger, women older than 50 yr, and all women combined (Table 3).

#### Associations of TRFL with indices of insulin resistance, leptin, and CRP

Table 4 summarizes the relations of age- and smoking-adjusted TRFL with indices of glucose regulation (fasting insulin, glucose, and HOMA-IR), leptin, and CRP in pre- and postmenopausal women. Age- and smoking-adjusted TRFL was inversely correlated with indices of glucose regulation in premenopausal but not postmenopausal women. Age- and smoking-adjusted TRFL was also inversely correlated with leptin in premenopausal women. This relation was of borderline significance in the postmenopausal women. For the premenopausal women, the relations between age- and smoking-adjusted TRFL and indices of glucose regulation were considerably more robust than those between TRFL and leptin. Age- and smoking-adjusted TRFL was inversely correlated with CRP in premenopausal but not postmenopausal women.

Given the high correlations among HOMA-IR, leptin, and CRP, we performed multiple stepwise regression analysis, including in the model the following independent variables: age, smoking history, ln-HOMA-IR, ln-leptin, and ln-CRP (Table 5). For premenopausal women, age, smoking, ln-HOMA-IR, ln-CRP, but not ln-leptin independently accounted for variation in TRFL. For postmenopausal women, age and smoking but not ln-HOMA-IR, ln-leptin, and ln-CRP independently accounted for variation in TRFL.

To further ascertain that age or its interaction was not a confounder for the TRFL findings, we also explored within twin pair differences for discordant pairs. For 204 pairs (114 aged 50 yr or younger, 90 aged older than 50 yr) discordant

for HOMA-IR (top and bottom quartiles of the HOMA-IR distribution), the twin with low HOMA-IR had on average 183 bp longer telomeres than the twin with high HOMA-IR (7.01 ± 0.08 vs. 7.20 ± 0.08 kb, *P* < 0.10) among women aged 50 yr or younger. However, among women aged older than 50 yr, the twins with low HOMA-IR had telomeres 40 bp shorter (6.72 ± 0.10 vs. 6.67 ± 0.10 kb, *P* < 0.77) than the twin with high HOMA-IR. Although the differences are not statistically significant, the data are consistent with the results from the multiple linear regressions.

### Discussion

The central findings of the present work were as follows: insulin resistance, leptin, and CRP were inversely correlated with leukocyte telomere length in premenopausal but not postmenopausal women. In addition, the underlying mechanisms that accounted for variation in leukocyte telomere length in premenopausal women appeared to relate to insulin resistance and inflammation (CRP) rather than leptin. The question then is: what are the factors that might explain these enigmatic differences between pre- and postmenopausal women?

Neither insulin nor glucose is likely to be the factor that mechanistically connects insulin resistance with leukocyte telomere dynamics. Rather, the states of insulin resistance and adiposity, expressed by inflammation and perhaps oxidative stress (1–5), probably modify leukocyte telomere attrition.

One potential explanation for the altered relation between insulin resistance and leukocyte telomere length in postmenopausal women is aging itself. As women get older, the underlying reasons for their insulin resistance might be less related to the body mass and adiposity *per se*. Such a transformation would weaken the relation between leukocyte telomere dynamics and insulin resistance. For instance, studying lean (BMI < 25 kg/m<sup>2</sup>) elderly and young volunteers, Peterson *et al.* (14) observed marked insulin resistance

**TABLE 4.** Correlations of TRFL with insulin resistance, leptin, and CRP

| Factor                  | All Samples                         |                | Age ≤ 50 yr                         |                | Age > 50 yr                         |                |
|-------------------------|-------------------------------------|----------------|-------------------------------------|----------------|-------------------------------------|----------------|
|                         | Correlations with TRFL <sup>a</sup> | P <sup>b</sup> | Correlations with TRFL <sup>a</sup> | P <sup>b</sup> | Correlations with TRFL <sup>a</sup> | P <sup>b</sup> |
| ln-Insulin <sup>c</sup> | -0.069                              | 0.023          | -0.144                              | 0.002          | -0.003                              | 0.51           |
| ln-Glucose <sup>c</sup> | -0.032                              | 0.260          | -0.114                              | 0.005          | -0.010                              | 0.50           |
| ln-HOMA-IR <sup>c</sup> | -0.062                              | 0.054          | -0.149                              | 0.001          | 0.021                               | 0.56           |
| ln-Leptin <sup>c</sup>  | -0.069                              | 0.021          | -0.083                              | 0.037          | -0.066                              | 0.071          |
| ln-CRP <sup>c</sup>     | -0.050                              | 0.078          | -0.110                              | 0.017          | -0.016                              | 0.62           |

<sup>a</sup> Age- and smoking-adjusted TRFL.

<sup>b</sup> Adjusted for non independence between twins in a pair.

<sup>c</sup> In the natural logarithm scale.

**TABLE 5.** Multiple linear regression model of TRFL

| Factor                  | Age ≤ 50 yr |                         |         |                     | Age > 50 yr |                        |         |                    |
|-------------------------|-------------|-------------------------|---------|---------------------|-------------|------------------------|---------|--------------------|
|                         | Value       | SE                      | t value | P                   | Value       | SE                     | t value | P                  |
| (Intercept)             | 8.415       | 0.189                   |         |                     | 8.639       | 0.303                  |         |                    |
| Age                     | −0.026      | 0.003                   | 8.025   | $6 \times 10^{-15}$ | −0.025      | 0.005                  | 5.362   | $1 \times 10^{-7}$ |
| Smoking history         | −0.061      | 0.031                   | 1.971   | 0.049               | −0.096      | 0.038                  | 2.523   | 0.012              |
| ln-HOMA-IR              | −0.139      | 0.053                   | 2.619   | 0.009               | 0.060       | 0.042                  | 1.422   | 0.156              |
| ln-Leptin               | 0.029       | 0.052                   | 0.559   | 0.576               | −0.078      | 0.048                  | 1.612   | 0.108              |
| ln-CRP                  | −0.054      | 0.026                   | −1.996  | 0.046               | −0.047      | 0.032                  | 1.490   | 0.137              |
| Multiple R <sup>2</sup> | 0.126       | $P < 1 \times 10^{-15}$ |         |                     | 0.075       | $P < 2 \times 10^{-6}$ |         |                    |

in the elderly, which arose from a decline in insulin-mediated glucose metabolism in skeletal muscle, associated with a considerable reduction in mitochondrial oxidative activity and phosphorylation. These findings indicate that independent of adiposity, aging itself contributes to insulin resistance, and they point to an aging-related shift in the mechanisms behind insulin resistance.

Another alternative explaining the absent association between leukocyte telomere length and insulin resistance in postmenopausal women is the dramatic decline in ovarian steroid hormones, particularly estrogen, during the postmenopausal period. Estrogen may be linked to leukocyte telomere dynamics through its antiinflammatory and antioxidant attributes and its ability to stimulate telomerase, a reverse transcriptase that elongates telomere ends (24).

Estrogen is a potent antiinflammatory agent because it lowers the production of cytokines, including the proinflammatory TNF $\alpha$  (25–28). Depending on tissues examined, insulin resistance may arise from or be caused by oxidative stress (29–32). One of the factors that defend against oxidative stress is estrogen (32–34). The antioxidant activity of estrogen may also mediate its antidiabetic property (35). Estrogen serves as an antioxidant by mechanisms that are not fully elucidated but appear to be exerted via membrane/cytoplasmic receptors (36). Estrogen stimulates the mitochondrial superoxide dismutase (Mn-SOD) and glutathione peroxidase (Gpx) (32), two powerful enzymes engaged in the metabolism of reactive oxygen species. Because neither Mn-SOD nor Gpx has an estrogen-responsive element in its promoter regions, a direct genomic effect in this stimulation is unlikely.

In contrast to Mn-SOD and Gpx, the catalytic subunit of telomerase (TERT) promoter possesses not only an estrogen-response element (37) but also binding sites for a number of transcription factors, including nuclear factor- $\kappa$ B (NF $\kappa$ B) (38). Telomerase comprises, in addition to TERT, a RNA subunit (24). Whereas the RNA subunit is constitutively expressed in most cells, the activity of the enzyme correlates with the expression of TERT. Estrogen stimulates telomerase via TERT and through other posttranscriptional modifications that include Akt protein kinase, a downstream mediator of phosphoinositol 3-kinase (PI3K) (39, 40). The PI3K mode of telomerase activation is particularly relevant in that estrogen stimulates the PI3K/Akt cascade and induces the association of NF $\kappa$ B with TERT in different cell types, including lymphocytes (41–43). In addition, estrogen induces the Akt-dependent endothelial nitric-oxide synthase (44) to increase nitric oxide production and stimulate telomerase activity (45). These effects may explain telomere dynamics in

cells possessing estrogen receptors (45, 46). Because estrogen-mediated up-regulation of Mn-SOD and Gpx expressions is also through the NF $\kappa$ B (32), the hormone may exert some of its antioxidant effects and stimulate telomerase through the same cellular pathways.

The postmenopausal period would therefore dramatically recast some of the key variables that affect leukocyte telomere dynamics. Not only the drop in estrogen but also the redistribution of body fat centrally would alter leukocyte telomere attrition because fat is the source of both leptin and other adipocytokines that impact both inflammation and insulin resistance (47, 48). Subsequently the changing nature of insulin resistance with age would further modify its link to leukocyte telomere dynamics. In this regard, the fact that CRP accounted independently of insulin resistance for variation in leukocyte telomere length in premenopausal women suggests that the effect of inflammation on leukocyte telomere dynamics goes above and beyond that of insulin resistance.

Because leukocyte telomere length is a record of their replicative history and the cumulative burden of inflammation and oxidative stress over the life of the individual, menopause might alter the trajectory of telomere attrition and thereby offset the relations between telomere length and indices of insulin resistance and inflammation observed during the premenopausal period. This tenet can be explored by longitudinal studies of leukocyte telomere dynamics, which may enrich our understanding of the role of menopause in the biology of human aging.

### Acknowledgments

Received August 11, 2005. Accepted November 11, 2005.

Address all correspondence and requests for reprints to: Abraham Aviv, M.D., Room F-464 MSB, Department of Pediatrics, Hypertension Research Center, University of Medicine and Dentistry of New Jersey, New Jersey Medical School, 185 South Orange Avenue, Newark, New Jersey 07103. E-mail: avivab@umdnj.edu.

This work was supported in part by Wellcome Trust Grant ref 074951 (to T.D.S.), National Institutes of Health Grants AG021593, HL070137, and AG020132 (to A.A.), and The Healthcare Foundation of New Jersey (to A.A.).

### References

1. Savage DB, Petersen KF, Shulman GI 2005 Mechanisms of insulin resistance in humans and possible links with inflammation. *Hypertension* 45:828–833
2. Das UN 2004 Metabolic syndrome X: an inflammatory condition? *Curr Hypertens Rep* 6:666–673
3. Dadona P, Aljada A, Bandyopadhyay A 2004 Inflammation: the link between insulin resistance, obesity and diabetes. *Trends Immunol* 25:4–7
4. Fantuzzi G 2005 Adipose tissue, adipokines, and inflammation. *J Allergy Clin Immunol* 115:911–919

5. Julian D, Leeuwenburgh C 2004 Linkage between insulin and the free radical theory of aging. *Am J Physiol* 286:R20–R21
6. Higdon JV, Frei B 2003 Obesity and oxidative stress. *Arterioscler Thromb Vasc Biol* 23:365–367
7. Aviv A 2004 Telomeres and human aging: facts and fibs. *Sci Aging Knowledge Environ* 51:pe43
8. Gardner JP, Shengxu L, Srinavasan SR, Chen W, Kimura M, Lu X, Berenson GS, Aviv A 2005 Rise in insulin resistance is associated with escalated telomere attrition. *Circulation* 111:2171–2177
9. Valdes AM, Andrew T, Gardner JP, Kimura MA, Oelsner E, Cherkas LF, Aviv A, Spector T 2005 Obesity, cigarette smoking, and telomere length in women. *Lancet* 366:662–664
10. Defranzo RA 1979 Glucose intolerance and aging: evidence for tissue insensitivity to insulin. *Diabetes* 28:1095–1101
11. Gumbiner B, Polonsky S, Beltz WF, Wallace P, Brechtel G, Fink RI 1989 Effect of aging on insulin secretion. *Diabetes* 38:1549–1556
12. Achang AM, Halter JB 2003 Aging and insulin secretion. *Am J Physiol Endocrinol Metab* 284:E7–E12
13. Basu R, Breda E, Oberg AL, Powell CC, Man CD, Basu A, Vittone JL, Klee GG, Arora P, Jensen MD, Toffolo G, Cobelli C, Rizza RA 2003 Mechanisms of age-associated deterioration in glucose tolerance: contribution of alterations in insulin secretion, action and clearance. *Diabetes* 52:1738–1748
14. Peterson KF, Befroy D, Dufour S, Dziura J, Arlyn C, Rothman DL, DiPietro L, Cline GW, Shulman GI 2003 Mitochondrial dysfunction in the elderly: possible role in insulin resistance. *Science* 300:1140–1142
15. Russell CD, Petersen RN, Rao SP, Ricci MR, Passad A, Zhang Y, Brolin RE, Fried SK 1998 Leptin expression in adipose tissue from obese humans: depot-specific regulation by insulin and dexamethasone. *Am J Physiol* 275:E507–E515
16. Takahashi M, Funahashi T, Shimomura I, Miyoka K, Matsuzawa Y 1996 Plasma leptin levels and body fat distribution. *Horm Metab Res* 28:751–752
17. Cnop M, Landchild MJ, Vidal J, Havel PJ, Knowels NG, Carr DR, Wang F, Hull RL, Bokko EJ, Retzlaff BM, Walden CE, Knopp RH, Kahn SE 2002 The concurrent accumulation of intra-abdominal and subcutaneous fat explains the association between insulin resistance and plasma leptin concentrations: distinct metabolic effects of two fat compartments. *Diabetes* 51:1005–1015
18. Woods SC, Gotoh K, Clegg DJ 2003 Gender differences in control of energy homeostasis. *Exp Biol Med* 228:1175–1180
19. Willerson JT, Ridker PM 2004 Inflammation as a cardiovascular risk factor. *Circulation* 109(Suppl II):II-2–II-10
20. Black S, Kushner I, Samols D 2004 C-reactive protein. *J Biol Chem* 279:48487–48490
21. Ferrie JE, Martikainen P, Shipley MJ, Marmot MG 2005 Self-reported economic difficulties and coronary events in men: evidence from the Whitehall II study. *Int J Epidemiol* 1–9
22. Spector TD, MacGregor AJ 2002 The St. Thomas' UK Adult Twin Registry. *Twin Res* 5:440–443
23. de Lange M, Sneider H, Arien RAS, Andrew T, Grant PJ, Spector TD 2003 The relation between insulin resistance and homeostasis: pleiotropic genes and common environment. *Twin Res* 6:152–161
24. Blackburn EH 2005 Telomeres and telomerase: their mechanisms and the effects of altering their functions. *FEBS Lett* 579:859–862
25. Arenas IA, Armstrong SJ, Sandra YX, Davidge ST 1995 Chronic tumor necrosis factor- $\alpha$  inhibition enhances NO modulation of vascular function in estrogen-deficient rats. *Hypertension* 46:76–81
26. Anderson HD, Rahmutula D, Gardner DG 2004 Tumor necrosis factor- $\alpha$  inhibits endothelial nitric-oxide synthase gene promoter activity in bovine aortic endothelial cells. *J Biol Chem* 279:963–969
27. Dantas APV, Sandberg K 2005 Estrogen regulation of tumor necrosis factor- $\alpha$ : a missing link between menopause and cardiovascular risk in women? *Hypertension* 56:21–22
28. Pfeilschifter J, Koditz R, Pfohl M, Schatz H 2002 Changes in proinflammatory cytokine activity after menopause. *Endocrinol Rev* 23:90–119
29. Robertson RP 2004 Chronic oxidative stress as a central mechanism for glucose toxicity in pancreatic islet  $\beta$  cells in diabetes. *J Biol Chem* 279:42351–42354
30. Ceriello A, Motz E 2004 Is oxidative stress the pathogenic mechanism underlying insulin resistance, diabetes, and cardiovascular disease? The common soil hypothesis revisited. *Arterioscler Thromb Vasc Biol* 24:816–823
31. Banday AA, Marwaha A, Tallam LS, Lokhandwala MF 2005 Tempol reduces oxidative stress, improves insulin sensitivity, decreases renal dopamine D1 receptor hyperphosphorylation, and restores D1 receptor-G-protein coupling and function in obese Zucker rats. *Diabetes* 54:2219–2226
32. Vina J, Borras C, Gambini J, Sastre J, Pallardo FV 2005 Why females live longer than males? Importance of the upregulation of longevity-associated genes by oestrogenic compounds. *FEBS Lett* 579:2541–2545
33. Baba T, Shimizu T, Suzuki Y, Ogawara M, Isono K, Koseki H, Kuosawa H, Shirasawa T 2005 Estrogen, insulin, and dietary signals cooperatively regulate longevity signals to enhance resistance to oxidative stress in mice. *J Biol Chem* 280:16417–16426
34. Egan KM, Lawson JA, Fries S, Koller B, Rader DJ, Smyth EM, FitzGerald GA 2004 COX-2 derived prostacyclin confers atheroprotection on female mice. *Science* 306:1954–1957
35. Louet J-F, LeMay C, Mauvais-Javis F 2004 Antidiabetic actions of estrogen: insight from human and genetic mouse models. *Curr Atheroscler Rep* 6:180–185
36. Levin ER 2001 Cell localization, physiology and nongenomic actions of estrogen receptors. *J Appl Physiol* 91:1860–1867
37. Kyo S, Takakura M, Kanaya T, Zhuo W, Fujimoto K, Nishio Y, Orimo A, Inoue M 1999 Estrogen activates telomerase. *Cancer Res* 59:5917–5921
38. Akiyama M, Yamada O, Hideshima T, Yanagisawa T, Yokoi K, Fujisawa K, Eto Y, Yamada H, Anderson KC 2004 TNF $\alpha$  induces rapid activation and nuclear translocation of telomerase in human lymphocytes. *Biochem Biophys Res Commun* 316:528–532
39. Kang SS, Kwon T, Kwon DY, Do SI 1999 Akt protein kinase enhances human telomerase activity through phosphorylation of telomerase reverse transcriptase subunit. *J Biol Chem* 274:13085–13090
40. Breitschopf K, Zeiher A, Dimmeler S 2001 Pro-atherogenic factors induce telomerase inactivation in endothelial cells through an Akt-dependent mechanism. *FEBS Lett* 493:21–25
41. Simoncini T, Hafezi-Moghadam A, Brazil DP, Ley K, Chin WW, Liao JK 2000 Interaction of oestrogen receptor with the regulatory subunit of phosphatidylinositol-3-OH kinase. *Nature* 407:538–541
42. Du B, Ohmichi M, Takahashi K, Kawagoe J, Ohshima C, Igarashi H, Mori-Abe A, Saitoh M, Ohta T, Ohishi A, Doshida M, Tezuka N, Takahashi T, Kurachi H 2004 Both estrogen and raloxifene protect against  $\beta$ -amyloid-induced neurotoxicity in estrogen receptor  $\alpha$ -transfected PC12 cells by activation of telomerase activity via Akt cascade. *J Endocrinol* 183:605–615
43. Kyo S, Inoue M 2002 Complex regulatory mechanisms of telomerase activity in normal and cancer cells: how can we apply them for cancer therapy? *Oncogene* 21:688–697
44. Hisamoto K, Ohmichi M, Kurachi H, Hayakawa J, Kanda Y, Nishio Y, Adachi K, Tasaka K, Miyoshi E, Fujiwara N, Taniguchi N, Murata Y 2001 Estrogen induces the Akt-dependent activation of endothelial nitric-oxide synthase in vascular endothelial cells. *J Biol Chem* 276:3459–3476
45. Vasa M, Breitschopf K, Zeiher AM, Dimmeler S 2000 Nitric oxide activates telomerase and delays endothelial cell senescence. *Circ Res* 87:540–542
46. Sato R, Maesawa C, Fujisawa K, Wada K, Oikawa K, Takikawa Y, Suzuki K, Oikawa H, Ishikawa K, Masuda T 2004 Prevention of critical telomere shortening by oestradiol in human normal hepatic cultured cells and carbon tetrachloride induced rat liver fibrosis. *Gut* 53:1001–1009
47. Fasshauer M, Pascheke R 2003 Regulation of adipocytokines and insulin resistance. *Diabetologia* 46:1594–1603
48. Guerre-Millo M 2004 Adipose tissue and adipokines: for better or worse. *Diabetes Metab* 30:13–19
